# Supplementary material
Source: PubMed Central journal article supplement (PMC9890507)



**Supplemental Figure 1.** Amputation rate by age group.

## Three month amputation rates across age groups

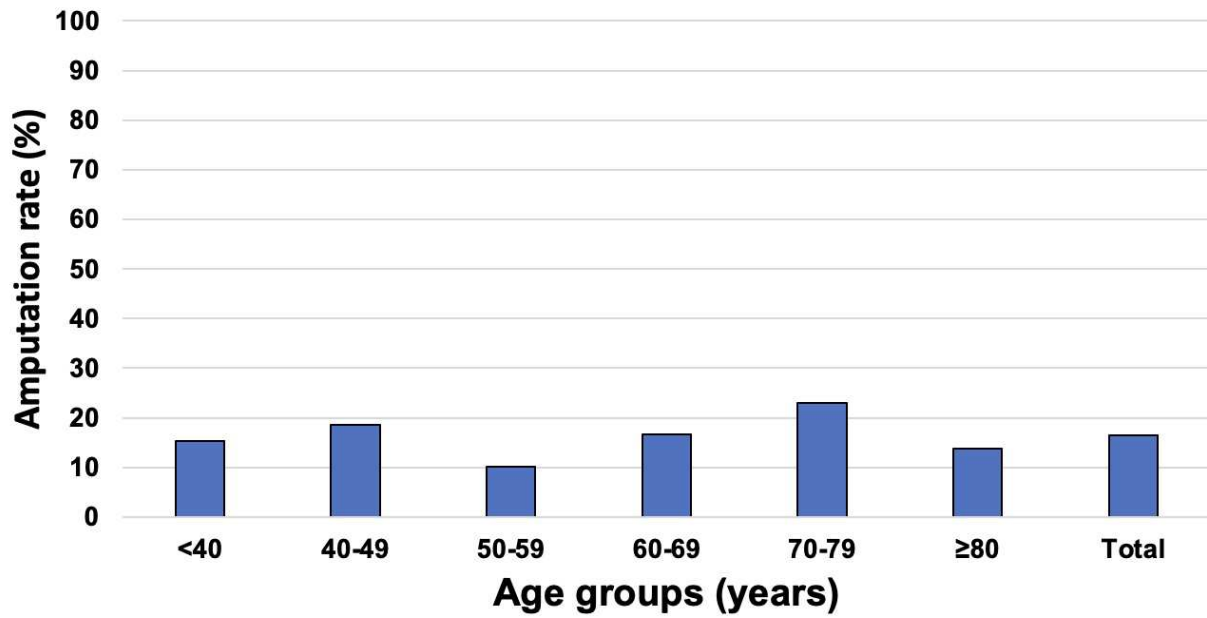

Supplement: NIHMS1815845-supplement-1.pdf [file NIHMS1815845-supplement-1.pdf]
